# Supplementary material for: External field-assisted solution synthesis and selectively catalytic properties of amorphous iron nanoplatelets
Source: Royal Society of Chemistry journal article supplement (doi:10.1039/c2jm15000j), 2012-01-01
Supplement: c2jm15000j.pdf [file c2jm15000j.pdf]

## Supporting Information

### External Fields-Assisted Solution Synthesis and Selectively Catalytic Properties of Amorphous Iron Nanoplatelets

Jianguo Guan,<sup>\* a £</sup> Gongqin Yan,<sup>a, b £</sup> Wei Wang<sup>a</sup> and Jun Liu<sup>c</sup>

*a. State Key Laboratory of Advanced Technology for Materials Synthesis and Processing, Wuhan University of Technology, Wuhan 430070, P. R. China; b. Mechanical Engineering Department, Guangxi University of Technology, Liuzhou, 545006, Guangxi, P. R. China; c. Pacific Northwest National Laboratory, Richland, WA 99352, USA*

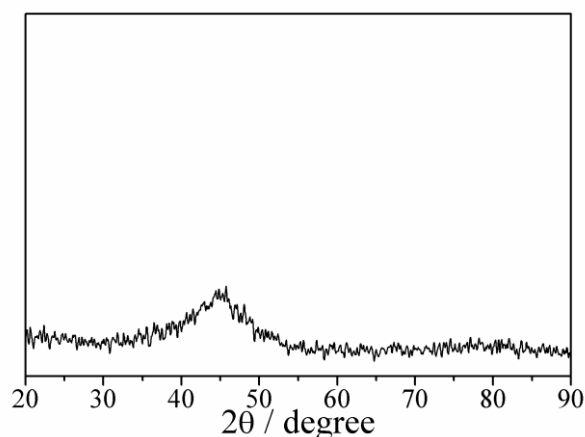

**Figure S1** The XRD pattern of the iron nanostructures obtained at  $[\text{FeSO}_4] = 0.5 \text{ M}$  but without the inducement of magnetic field.

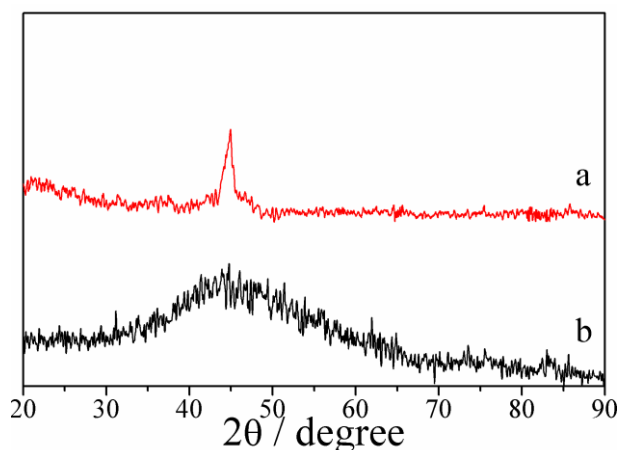

**Figure S2** The XRD patterns of the iron nanostructures obtained at  $[\text{FeSO}_4] = 0.5 \text{ M}$  and the different reaction temperatures of  $2^\circ\text{C}$  (a) and  $60^\circ\text{C}$  (b).

\* To whom correspondence should be addressed. Email: guanjg@whut.edu.cn, Tel: 86-27-87218832; Fax: 86-27-87879468.

£ These 2 authors contributed equally to this work.

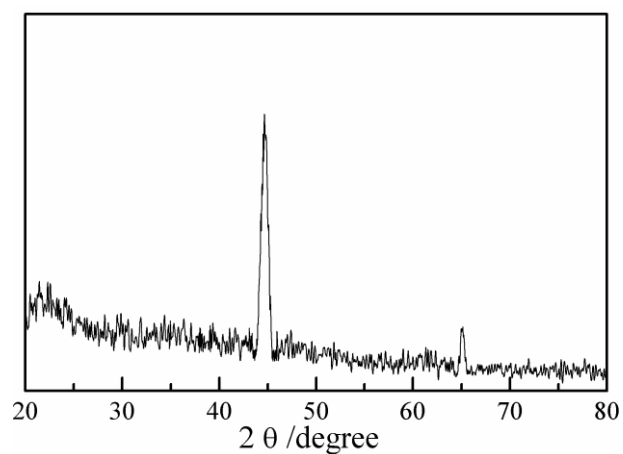

**Figure S3** The XRD pattern of the iron nanoplatelets after heated at 300 °C for 2 h in the atmosphere of argon.

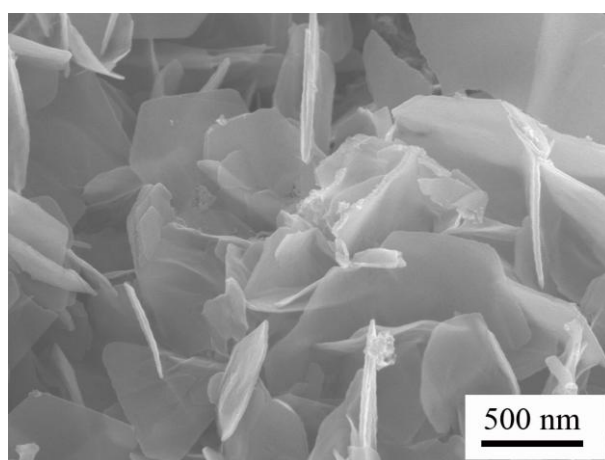

**Figure S4** The SEM image of the iron nanoplatelets after heated at 300 °C for 2 h in the atmosphere of argon.
